# Supplementary material
Source: publisher figshare collection journal article supplement (https://tandf.figshare.com/ndownloader/files/15577253)
Supplement: Supplementary file 1 [file 15577253]

## Sheet:  Fldspar
Supplementary Table 3
Representative microprobe analyses of feldspar from the Shouwangfen complex.
rock type	QM	QM	QM	QM	QM	QM	QD	QD	QD	QD	MME	MME	MME	MME	MME	MME	MME	MME	MME	MME	MME	MME	MME	MME	MME	MME	MME	MME	MME	MME	MME	MME	MME	MME	MME	MME	MME	MME	MME	MME	MME	MME	MME	MME	MME	MME	MME	MME	MME
sample no.	16BZ74-2-01	16BZ74-9-01	16BZ74-9-02	16BZ74-9-03	16BZ74-9-04	16BZ74-9-05	16WF65-1-01	16WF65-3-01	16WF65-3-02	16WF65-3-03	18GL27-2-01	18GL27-2-02	18GL27-2-03	18GL27-2-04	18GL27-2-05	18GL27-2-06	18GL27-2-07	18GL27-2-08	18GL27-3-01	18GL27-3-02	18GL27-7-01	18GL27-7-02	18GL27-7-03	18GL27-7-04	18GL27-7-05	18GL27-7-06	18GL27-7-07	18GL27-7-08	18GL27-7-09	18GL27-7-10	18GL27-7-11	18GL27-10-01	18GL27-10-02	18XB05-4-03	18XB05-6-01	18GL27-001core	18GL27-002rim	18GL27-003core	18GL27-004rim	18GL27-005	18GL27-006core	18GL27-007rim	18GL27-008	18GL27-009	18GL27-010	18GL27-011	18GL27-012core	18GL27-013rim	18GL27-014
SiO2(wt.%)	62.132	61.694	60.284	61.44	61.548	61.146	61.221	60.9	60.982	60.773	60.203	60.355	61.13	60.414	60.965	60.912	60.425	61.165	59.372	61.18	59.957	60.266	59.887	60.989	60.152	59.3	59.817	59.421	59.885	59.425	60.02	59.823	60.511	59.622	60.663	61.972	63.814	62.299	65.788	64.467	60.862	65.356	63.057	63.24	63.985	64.751	64.046	64.711	64.062
TiO2(wt.%)	0	0.021	0	0.048	0.001	0	0.017	0	0.05	0.064	0.039	0.055	0.016	0.016	0.022	0	0.004	0.008	0	0.05	0	0.086	0.038	0.074	0.037	0.002	0.004	0.008	0.037	0.103	0.01	0	0.05	0	0.059	0	0.02	0	0	0.018	0.052	0.012	0	0.008	0	0	0	0	0
Al2O3(wt.%)	22.935	22.907	24.373	23.1	23.539	23.006	22.672	19.681	23.832	19.844	24.557	24.05	23.619	24.243	24.005	23.509	24.437	23.251	25.086	23.807	24.329	24.15	23.999	23.835	24.913	24.716	24.016	25.504	24.953	24.515	24.808	24.585	20.852	24.274	25.253	23.473	22.249	23.284	22.484	21.686	20.662	20.745	22.76	22.069	22.49	22.11	22.059	21.979	21.74
Cr2O3(wt.%)	0.052	0	0.04	0.004	0	0	0.04	0.028	0.035	0	0	0.001	0	0	0.033	0.104	0.019	0.029	0.003	0.023	0.012	0	0.087	0.048	0	0.083	0	0	0.005	0.027	0.015	0.053	0.005	0.029	0	0.037	0.02	0	0	0.072	0.02	0.032	0	0	0.177	0.005	0.005	0.07	0.005
FeOT(wt.%)	0.222	0.243	0.192	0.224	0.12	0.222	0.224	0.082	0.195	0.06	0.251	0.287	0.206	0.237	0.278	0.254	0.202	0.167	0.283	0.157	0.197	0.295	0.296	0.179	0.235	0.279	0.242	0.166	0.178	0.151	0.196	0.192	0.157	0.278	0.285	0.098	0.206	0.126	0.114	0.211	0.042	0.212	0.126	0.143	0.203	0.158	0.209	0.336	0.224
MnO(wt.%)	0	0	0.031	0.045	0	0	0	0.019	0.007	0	0.007	0	0.039	0.005	0.019	0.003	0.03	0.021	0	0	0.006	0.05	0	0	0.003	0.037	0.018	0.004	0	0	0	0.027	0	0.01	0.01	0.025	0	0	0	0	0.068	0	0.021	0.021	0	0.029	0	0.048	0
MgO(wt.%)	0.015	0.02	0	0	0.004	0	0	0	0	0	0	0.029	0.012	0.006	0.002	0.023	0	0.009	0.033	0.016	0.004	0.004	0.02	0.017	0.005	0.003	0	0.001	0	0	0	0	0	0.021	0	0	0	0.005	0.005	0.023	0.02	0	0	0	0.024	0	0.013	0	0.001
CaO(wt.%)	3.412	3.534	5.293	3.751	4.133	3.801	4.334	0	3.751	0	3.703	3.695	3.741	3.959	4.407	4.077	4.789	4.575	4.348	4.341	3.566	3.772	4.778	4.13	3.989	3.959	3.683	4.679	4.109	4.297	3.979	3.707	0	4.642	4.705	5.167	3.958	5.39	3.291	3.247	3.079	2.591	4.224	3.918	4.127	3.588	3.669	3.493	3.574
Na2O(wt.%)	10.214	10.225	9.358	10.229	9.15	10.317	9.923	1.348	10.402	1.189	10.492	10.175	10.436	10.062	9.972	10.37	9.53	9.727	10.232	10.057	10.85	10.445	9.597	10.053	10.418	10.462	10.3	9.807	10.483	10.115	10.416	10.464	2.887	9.473	8.316	8.591	9.235	8.66	8.65	9.696	8.756	9.867	9.173	8.834	9.018	9.405	9.203	9.549	9.49
K2O(wt.%)	0.952	0.716	0.541	0.907	1.466	0.717	0.469	17.062	0.414	17.676	0.491	0.644	0.705	0.743	0.417	0.249	0.423	0.401	0.572	0.447	0.435	0.417	0.518	0.478	0.411	0.524	0.484	0.458	0.469	0.363	0.442	0.327	14.706	0.572	0.577	0.159	0.317	0.266	0.226	0.328	0.223	0.167	0.151	0.262	0.278	0.24	0.262	0.193	0.218
Total(wt.%)	100.015	99.429	100.144	99.911	99.958	99.243	98.9	99.208	99.742	99.606	99.783	99.352	99.921	99.727	100.158	99.627	100.012	99.427	99.955	100.144	99.528	99.495	99.232	99.9	100.258	99.365	98.636	100.079	100.134	99.064	100.05	99.331	99.215	98.922	99.98	99.869	100.147	100.331	100.832	99.971	94.242	99.279	99.849	98.851	100.546	100.573	99.795	100.671	99.513
An	14.82	15.44	23.14	16.07	18.42	16.3	18.97	0	16.26	0	15.91	16.15	15.94	17.17	19.2	17.62	21.25	20.2	18.47	18.82	15.04	16.28	20.99	18.04	17.1	16.84	16.08	20.37	17.38	18.66	17.04	16.1	0	20.66	23.02	24.72	18.81	25.21	17.13	15.33	16.05	12.55	20.11	19.38	19.86	17.17	17.78	16.63	17.01
Ab	80.26	80.84	74.04	79.3	73.8	80.04	78.59	10.72	81.6	9.27	81.58	80.49	80.48	78.99	78.63	81.1	76.52	77.7	78.64	78.88	82.78	81.58	76.3	79.47	80.8	80.51	81.4	77.26	80.25	79.47	80.71	82.21	22.98	76.31	73.62	74.37	79.4	73.31	81.47	82.83	82.57	86.49	79.03	79.08	78.54	81.46	80.71	82.27	81.75
Or	4.92	3.72	2.82	4.63	7.78	3.66	2.44	89.28	2.14	90.73	2.51	3.35	3.58	3.84	2.16	1.28	2.23	2.11	2.89	2.31	2.18	2.14	2.71	2.49	2.1	2.65	2.52	2.37	2.36	1.88	2.25	1.69	77.02	3.03	3.36	0.91	1.79	1.48	1.4	1.84	1.38	0.96	0.86	1.54	1.59	1.37	1.51	1.09	1.24
[truncated: 12 more columns]

## Sheet: Amphibole
Supplementary Table 3
Representative microprobe analyses of amphibole from the Shouwangfen complex.
rock type	QM	QM	QM	QM	QM	QD	QD	QD	QD	MME	MME	MME	MME	MME	MME	MME	MME	MME
sample no.	16BZ74-1-03	16BZ74-3-01	16BZ74-4-01	16BZ74-5-01	16BZ74-7-01	16WF65-2-01	16WF65-4-01	16WF65-4-03	16WF65-6-01	18GL27-5-01	18GL27-9-01	18GL27-11-01	18GL27-11-02	18GL27-11-03	18XB05-1-01	18XB05-3-01	18XB05-4-01	18XB05-7-01
SiO2(wt.%)	50.915	49.808	47.663	49.533	47.739	47.003	46.149	46.713	46.117	45.853	46.485	44.575	46.229	45.828	49.559	60.58	47.176	46.286
TiO2(wt.%)	0.292	0.734	0.978	0.562	0.874	1.154	1.252	0.878	1.187	1.412	1.381	1.281	1.15	1.291	0.673	0.039	1.211	1.441
Al2O3(wt.%)	2.263	3.251	4.851	3.362	4.113	4.735	5.766	5.043	4.857	5.424	5.7	6.526	5.427	5.781	2.411	18.449	4.614	5.423
Cr2O3(wt.%)	0	0.057	0	0	0	0.021	0	0.459	0	0.045	0.049	0	0.028	0.008	0.032	0	0.024	0
FeOT(wt.%)	11.769	12.528	13.895	12.692	13.528	14.064	14.813	14.76	16.046	14.657	14.811	15.715	14.193	14.553	11.293	0.198	13.046	13.801
MnO(wt.%)	0.666	0.708	0.676	0.704	0.646	0.432	0.386	0.442	0.372	0.555	0.545	0.522	0.501	0.511	0.395	0.009	0.386	0.302
MgO(wt.%)	18.086	17.045	16.496	18.01	17.378	15.905	14.931	15.469	14.429	15.286	15.137	14.977	15.98	15.553	15.469	0	17.345	17.062
CaO(wt.%)	11.949	11.642	11.363	11.408	11.225	11.95	11.499	11.826	11.965	11.489	11.712	11.431	11.696	11.452	19.772	0	11.216	10.704
Na2O(wt.%)	0.811	1.218	1.395	1.128	1.352	1.114	1.347	1.198	1.215	1.51	1.512	1.655	1.403	1.529	0.619	0.747	1.465	1.57
K2O(wt.%)	0.241	0.391	0.595	0.34	0.457	0.565	0.712	0.532	0.64	0.687	0.671	0.825	0.645	0.646	0.017	18.248	0.586	0.608
Physical-chemical conditions
T (°C)	invalid	849.383	invalid	invalid	invalid	906.745	893.112	911.008	903.467	931.589	908.823	969.921	936.814	935.844	invalid	invalid	invalid	invalid
P (kbar)	0.780581	1.00057	1.48628	1.02551	1.24998	1.46589	1.87098	1.58355	1.53117	1.73611	1.82024	2.21612	1.72247	1.87192	0.804514	invalid	1.4135	1.71089
continental depth (km)	2.94804	3.77889	5.61329	3.87309	4.72082	5.53628	7.06618	5.98063	5.78283	6.55682	6.87455	8.36968	6.50529	7.06975	3.03843	invalid	5.33839	6.46157
∆NNO	invalid	2.48737	invalid	invalid	invalid	2.20723	2.01508	2.04214	1.78793	2.01919	1.95872	1.888	2.17958	2.09445	invalid	invalid	invalid	invalid
logfO2	invalid	-10.3957	invalid	invalid	invalid	-9.61099	-10.0371	-9.69975	-10.0867	-9.3681	-9.81663	-8.86709	-9.12073	-9.21921	invalid	invalid	invalid	invalid
H2Omelt (wt.%)	invalid	2.80906	invalid	invalid	invalid	3.43305	3.372	3.69419	3.57282	3.14192	3.3595	3.21243	3.20921	3.28994	invalid	invalid	invalid	invalid
Species	invalid	Mg-Hbl	invalid	invalid	invalid	Mg-Hbl	Mg-Hbl	Mg-Hbl	Mg-Hbl	Mg-Hbl	Mg-Hbl	Mg-Hbl	Mg-Hbl	Mg-Hbl	invalid	low-Ca	invalid	invalid

## Sheet: Pyroxene
Supplementary Table 3
Representative microprobe analyses of pyroxene from the Shouwangfen complex.
rock type	MME	MME	MME	MME	MME	MME	MME	MME	MME	MME	MME	MME	MME	MME	MME	MME	MME	MME	MME	MME	MME	MME	MME	MME
sample no.	18XB05-1-02	18XB05-1-03	18XB05-1-04	18XB05-1-05	18XB05-6-02	18XB07-01	18XB07-02	18XB07-03	18XB07-04	18XB07-05	18XB07-06	18XB07-07	18XB07-08	18XB07-09	18XB07-10	18XB07-11	18XB07-001	18XB07-002	18XB07-003	18XB07-004	18XB07-005	18XB07-006	18XB07-007	18XB07-008
SiO2(wt.%)	50.076	49.982	50.048	49.508	47.655	53.389	44.868	53.46	53.079	50.498	53.269	54.174	54.163	0.12	60.094	51.209	53.443	53.592	53.748	53.322	49.883	53.526	56.242	51.051
TiO2(wt.%)	0.355	0.412	0.526	0.762	0.372	0.174	2.625	0.158	0.128	0.931	0.154	0.16	0.082	0	0.1	0.728	0.201	0.144	0.173	0.189	1.08	0.092	0.354	0.89
Al2O3(wt.%)	0.7	0.822	1.086	2.77	0.811	0.373	9.29	0.258	0.278	4.505	0.182	0.166	0.177	0	0.206	4.376	0.923	0.676	0.939	1.382	5.119	0.476	0.748	4.019
Cr2O3(wt.%)	0.046	0	0.096	0.238	0.297	0.118	0.365	0.077	0.145	0.034	0.059	0.106	0.063	0	0.187	0.017	0.101	0.173	0.092	0.115	0.143	0.115	0.021	0.112
FeOT(wt.%)	23.673	22.817	9.413	9.411	24.479	18.586	10.767	19.627	20.002	11.456	19.536	19.535	18.861	0.172	8.243	10.97	18.545	19.84	18.687	18.822	10.927	19.41	16.231	11.035
MnO(wt.%)	0.845	0.728	0.337	0.255	0.596	0.489	0.166	0.609	0.671	0.304	0.584	0.57	1.014	0.133	0.062	0.313	0.547	0.512	0.555	0.509	0.238	0.506	0.49	0.38
MgO(wt.%)	23.832	24.185	15.302	15.256	24.708	24.361	14.725	22.961	23.407	15.965	23.97	23.647	21.655	0	25.947	16.657	24.749	23.979	24.569	24.312	16.665	24.174	23.239	16.2
CaO(wt.%)	0.721	0.979	22.21	21.175	0.808	0.971	10.303	0.671	0.696	11.006	0.721	0.761	1.92	50.47	0.136	11.054	0.795	0.895	0.705	0.942	10.79	1.031	0.638	11.349
Na2O(wt.%)	0.038	0.051	0.697	0.685	0.048	0.11	1.579	0.052	0.021	0.968	0.01	0.006	0.09	0.163	0.209	0.91	0.031	0.131	0.066	0.035	0.933	0.025	0.197	0.678
K2O(wt.%)	0	0	0.031	0	0.005	0.007	0.501	0.016	0.007	0.322	0	0	0.039	0	0.068	0.301	0.009	0.027	0	0.035	0.456	0	0.022	0.402
Si	1.89169	1.88744	1.89596	1.8621	1.82841	1.98638	1.74213	2.00922	1.99077	1.93016	1.99124	2.00767	2.03211	0.01316	2.1598	1.93902	1.97091	1.97663	1.97761	1.9629	1.8997	1.98249	2.05907	1.94537
Al(ⅳ)	0.01009	0.0117	0.01499	0.02156	0.01074	0.01362	0.25787	0	0.00923	0.06984	0.00433	0	0	0	0	0.06098	0.02909	0.02337	0.02239	0.0371	0.1003	0.01751	0	0.05463
Al(ⅵ)	0	0	0	0	0	0.00274	0.16725	0.01143	0.00306	0.1331	0	0.00725	0.00783	0	0.00873	0.1343	0.01103	0.00601	0.01833	0.02286	0.12946	0.00327	0.03228	0.12587
Ti	0.01009	0.0117	0.01499	0.02156	0.01074	0.00487	0.07668	0.00447	0.00361	0.02677	0.00433	0.00446	0.00231	0	0.0027	0.02074	0.00558	0.004	0.00479	0.00523	0.03094	0.00256	0.00975	0.02551
Cr	0.00137	0	0.00288	0.00708	0.00901	0.00347	0.0112	0.00229	0.0043	0.00103	0.00174	0.00311	0.00187	0	0.00531	0.00051	0.00294	0.00504	0.00268	0.00335	0.00431	0.00337	0.00061	0.00337
Fe3+	0.24492	0.24806	0.26323	0.22486	0.40557	0.00889	0.10371	0	0	0	0	0	0	4.00555	0	0	0.00989	0.0224	0	0.00683	0	0.0113	0	0
Fe2+	0.48772	0.45763	0.02845	0.06562	0.35335	0.56899	0.2429	0.61974	0.62767	0.3676	0.61075	0.60805	0.59704	0	0.25813	0.34886	0.56161	0.58843	0.57527	0.5723	0.34821	0.58936	0.50682	0.35415
Mn	0.02704	0.02328	0.01081	0.00812	0.01937	0.01541	0.00546	0.01939	0.02132	0.00984	0.01849	0.01789	0.03222	0.01235	0.00189	0.01004	0.01709	0.01599	0.0173	0.01587	0.00768	0.01587	0.01519	0.01227
Mg	1.34212	1.36149	0.86417	0.85541	1.41322	1.35119	0.85233	1.28646	1.30874	0.9097	1.33575	1.30643	1.21119	0	1.3902	0.94024	1.36064	1.31845	1.34764	1.3342	0.94612	1.33476	1.26834	0.92029
Ca	0.02918	0.03961	0.9015	0.85334	0.03322	0.03871	0.42863	0.02702	0.02797	0.45073	0.02888	0.03022	0.07718	5.92825	0.00524	0.44846	0.03141	0.03537	0.02779	0.03715	0.44028	0.04091	0.02503	0.46337
Na	0.00278	0.00373	0.05119	0.04995	0.00357	0.00794	0.11887	0.00379	0.00153	0.07174	0.00072	0.00043	0.00655	0.03465	0.01456	0.06681	0.00222	0.00937	0.00471	0.0025	0.06889	0.0018	0.01398	0.05009
K	0	0	0.0015	0	0.00024	0.00033	0.02482	0.00077	0.00033	0.0157	0	0	0.00187	0	0.00312	0.01454	0.00042	0.00127	0	0.00164	0.02215	0	0.00103	0.01954
Wo	1.37	1.86	42.54	41.48	1.49	1.94	24.47	1.38	1.41	24.91	1.45	1.54	4.01	99.04	0.31	24.72	1.58	1.78	1.41	1.89	24.31	2.05	1.37	25.74
En	62.9	63.81	40.78	41.58	63.42	67.86	48.65	65.76	65.86	50.27	66.97	66.55	62.95	0	83.24	51.82	68.62	66.25	68.31	67.77	52.24	66.94	69.33	51.12
Fs	35.6	34.16	14.27	14.51	34.93	29.8	20.1	32.67	32.66	20.86	31.55	31.89	32.7	0.38	15.57	19.78	29.68	31.5	30.04	30.22	19.65	30.92	28.54	20.35
Ac	0.13	0.17	2.42	2.43	0.16	0.4	6.79	0.19	0.08	3.96	0.04	0.02	0.34	0.58	0.87	3.68	0.11	0.47	0.24	0.13	3.8	0.09	0.76	2.78

## Sheet: Magnetite
Supplementary Table 3
Representative microprobe analyses of magnetite from the Shouwangfen complex.
rock type	QM	QM	QM	QM	QD	QD	MME	MME	MME
sample no.	16BZ74-1-01	16BZ74-1-02	16BZ74-5-03	16BZ74-8-02	16WF65-4-04	16WF65-6-02	18GL27-5-02	18XB05-4-02	18XB05-7-02
SiO2(wt.%)	12.624	0.06	0.044	0.057	0.279	0.051	0.23	0.05	0.056
TiO2(wt.%)	0	0.071	0.09	0.082	0.115	0.117	0.361	0.145	49.314
Al2O3(wt.%)	2.317	0	0.027	0.006	0.104	0.018	0.076	0.045	0.028
Cr2O3(wt.%)	0.092	0.087	0.059	0.132	0.082	0.151	0.109	0.59	0.066
FeOT(wt.%)	69.112	93.131	93.95	93.736	93.548	93.504	93.082	91.726	47.914
MnO(wt.%)	0	0.112	0.284	0.176	0.016	0.008	0.016	0.125	3.339
MgO(wt.%)	0.08	0	0.016	0.045	0	0	0.038	0.014	0.029
CaO(wt.%)	0.48	0.099	0.021	0.015	0.029	0.085	0.093	0.03	0.041
Na2O(wt.%)	0.068	0.018	0.042	0.048	0.11	0.058	0.05	0.081	0.063
K2O(wt.%)	0.06	0.002	0	0	0.081	0.005	0.057	0.01	0.011
Total	85.299	93.752	94.733	94.441	94.543	94.286	94.239	93.096	100.871

## Sheet:  Titanite
Supplementary Table 3
Representative microprobe analyses of titanite from the Shouwangfen complex.
rock type	QM	QM	QM	QM	QM	QD
sample no.	16BZ74-3-02	16BZ74-4-02	16BZ74-5-02	16BZ74-6-01	16BZ74-8-01	16WF52-4-02
SiO2(wt.%)	28.398	28.459	28.616	27.907	28.324	28.477
TiO2(wt.%)	42.073	42.112	40.69	41.234	42.236	41.354
Al2O3(wt.%)	0.732	1.092	1.171	0.711	0.961	0.838
Cr2O3(wt.%)	0.065		0.037	0.05	0.057	0.03
FeOT(wt.%)	1.465	1.545	2.205	1.326	1.588	1.605
MnO(wt.%)	0.11	0.119	0.054	0.161	0.09	0.111
MgO(wt.%)	0.023	0.004	0.019		0.03	0.004
CaO(wt.%)	27.147	26.323	26.174	26.86	26.298	27.27
Na2O(wt.%)	0.041	0.072	0.07	0.075	0.064	0.067
K2O(wt.%)	0.011	0.001	0.003		0.023	0.011
Total	100.231	99.887	99.142	98.358	99.764	99.851
